# Supplementary material for: Magnetic Iron Oxide Nanoneedles with Hierarchical Structure for Controllable Catalytic Activity of 4-Nitrophenol Reduction
Source: MDPI journal article supplement (doi:10.3390/nano13061037), 2023-03-13
Supplement: s1 [file s1]

*Supplementary Materials*

# **Magnetic Iron Oxide Nanoneedles with Hierarchical Structure for Controllable Catalytic Activity of 4-Nitrophenol Reduction**

**Hyokyung Jeon <sup>1</sup> and Ha-Jin Lee <sup>2,\*</sup>**

<sup>1</sup> Western Seoul Center, Korea Basic Science Institute, 150 Bugahyun-ro, Seoudaemun-gu, Seoul 03759, Republic of Korea

<sup>2</sup> Division of Chemistry and Bio-Environmental Sciences, Seoul Women's University, 621 Hwarangro, Nowon-gu, Seoul 01797, Republic of Korea

\* Correspondence: hajinlee@swu.ac.kr; Tel.: +82-2-970-5654

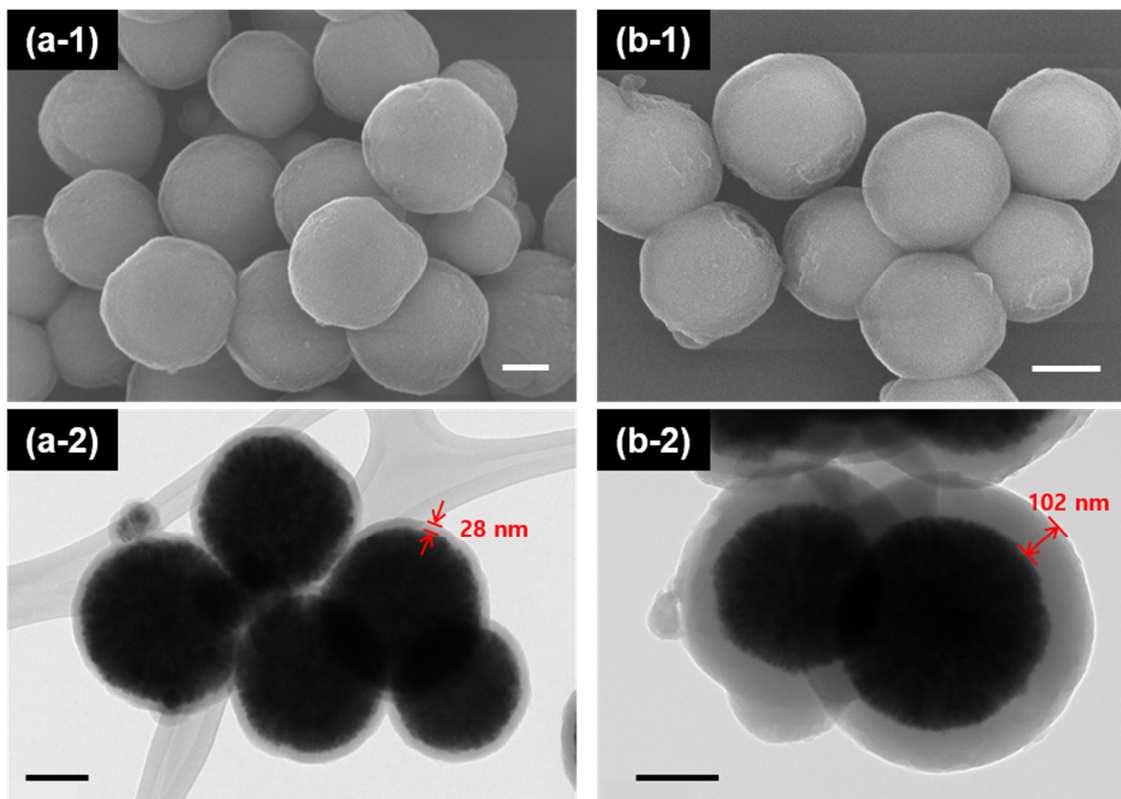

**Figure S1.** SEM and TEM images of (a) MNP@PD<sub>30</sub> and (b) MNP@PD<sub>100</sub>. All scale bars represent 200 nm.

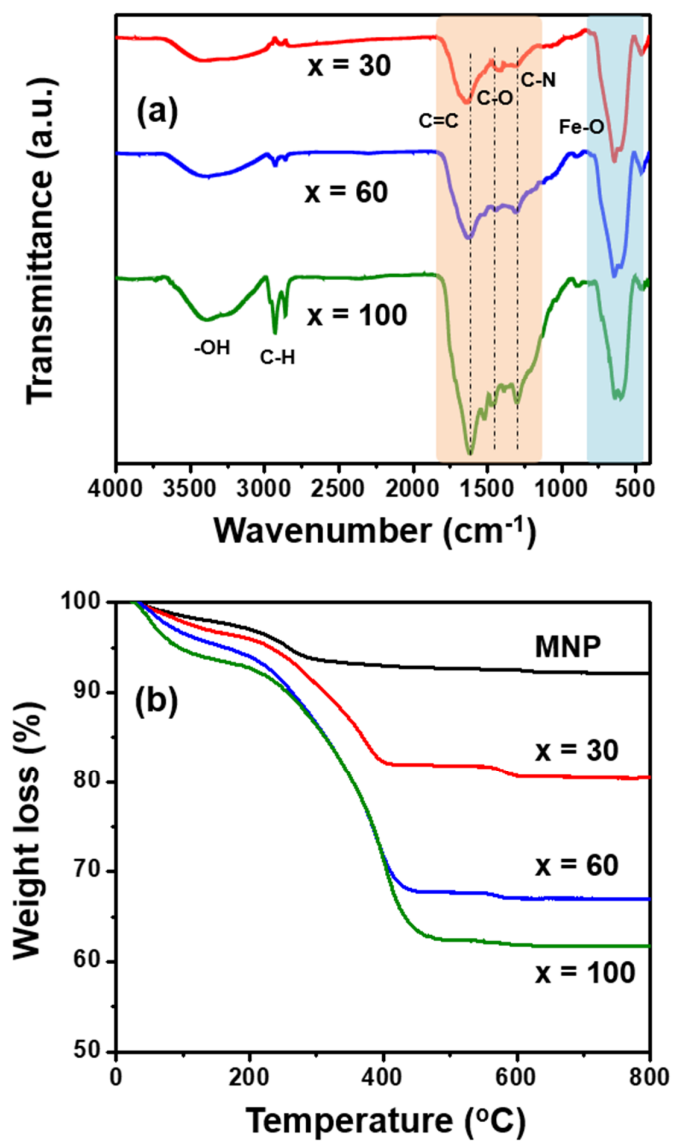

**Figure S2.** (a) FT-IR spectra and (b) TGA data of MNP@PD<sub>x</sub> (x=30, 60 and 100).

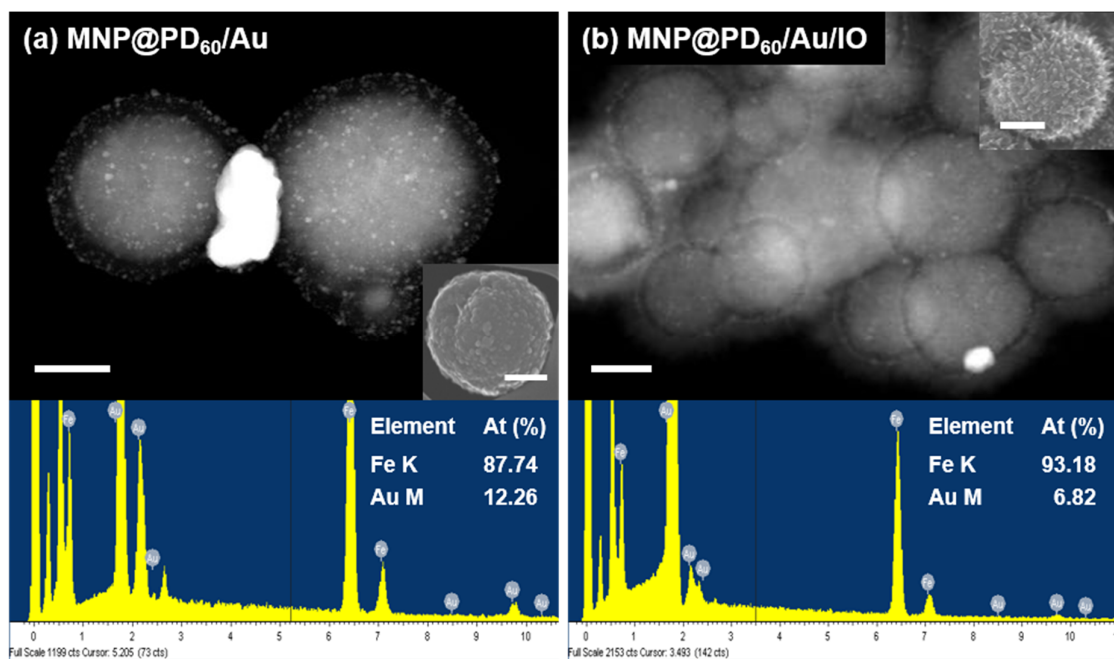

**Figure S3.** STEM images and the corresponding EDX data of (a) MNP@PD<sub>60</sub>/Au and (b) MNP@PD<sub>60</sub>/Au/IO. Insets of the STEM images are the corresponding SEM images, and all scale bars represent 200 nm.

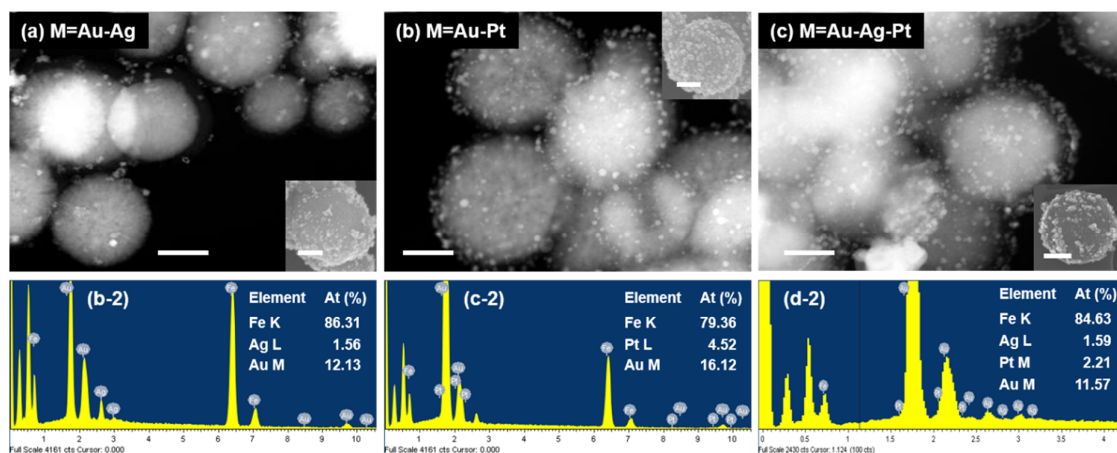

**Figure S4.** STEM images and the corresponding EDX data of MNP@PD<sub>60</sub>/M, where M is (a) Au-Ag, (b) Au-Pt and (c) Au-Ag-Pt. Insets of the TEM images are the corresponding SEM images, and all scale bars represent 200 nm.

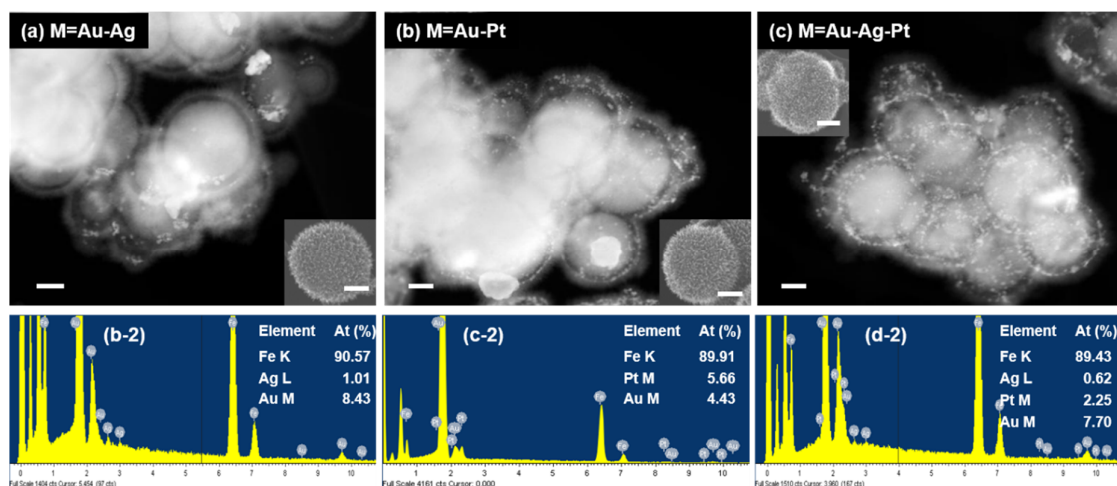

**Figure S5.** STEM images and the corresponding EDX data of MNP@PD<sub>60</sub>/M/IO, where M is (a) Au-Ag, (b) Au-Pt and (c) Au-Ag-Pt. Insets of the TEM images are the corresponding SEM images, and all scale bars represent 200 nm.

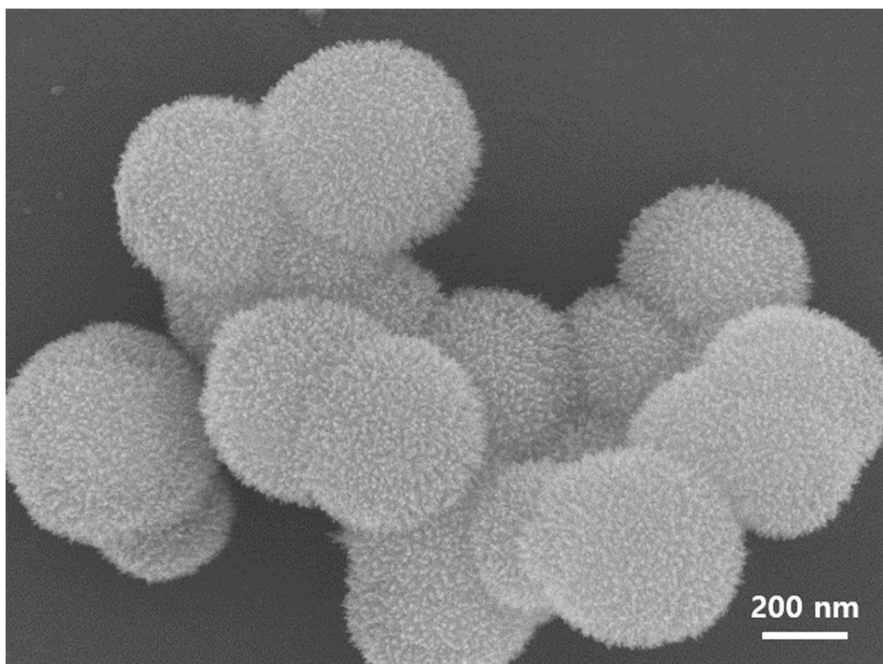

**Figure S6.** SEM image of MNP@PD<sub>60</sub>/IO.

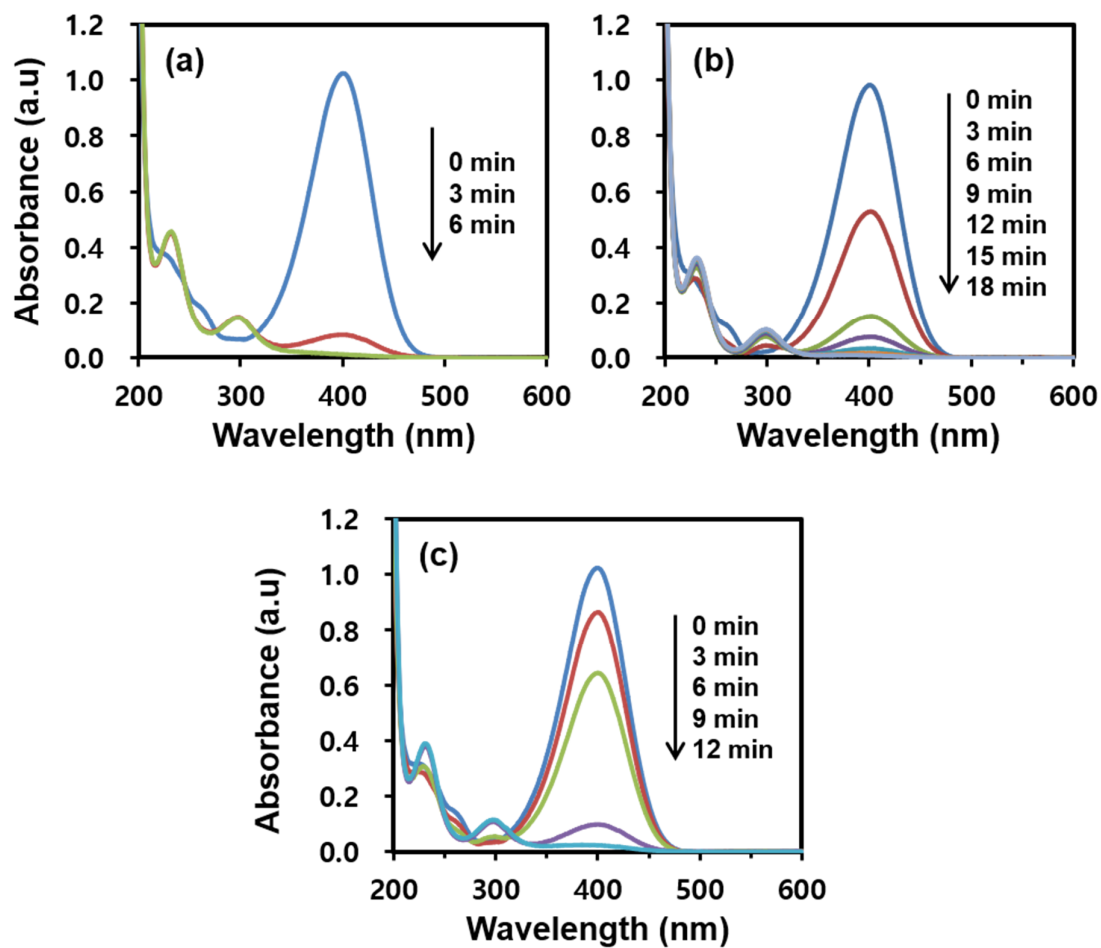

**Figure S7.** Time-dependent UV-vis absorption spectral changes of the 4-NPh reduction in the presence of MNP@PD<sub>60</sub>/M/IO, where M is (a) Au-Ag-Pt, (b) Au-Pt and (c) Au-Ag.

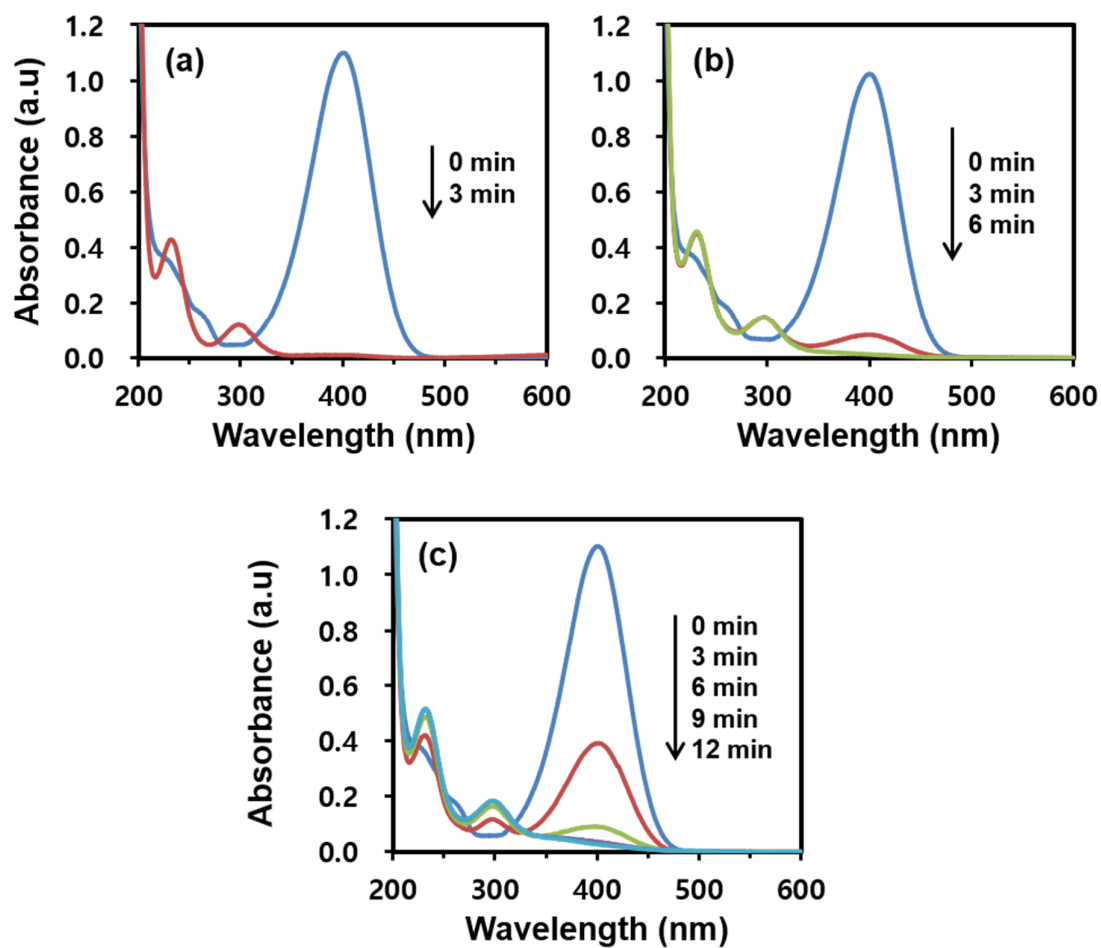

**Figure S8.** Time-dependent UV-vis absorption spectral changes of the 4-NPh reduction in the presence of MNP@PD<sub>x</sub>/Au-Ag-Pt/IO: (a) x=30, (b) x=60 and (c) x=100.



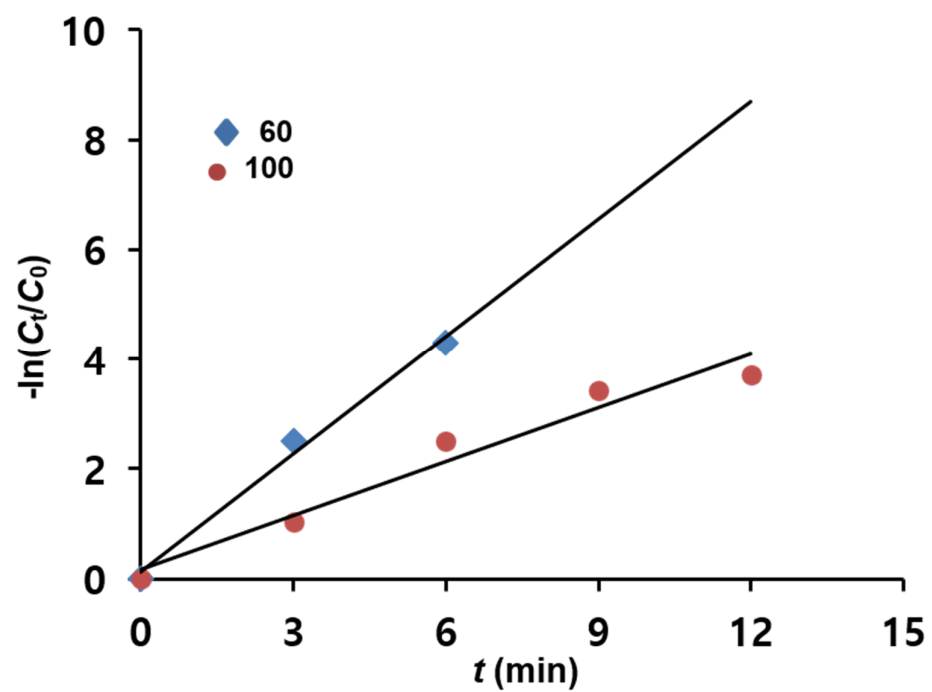

**Figure S9.** Plot of  $-\ln(C_t/C_0)$  versus time ( $t$ ) for the reduction of 4-NPh with MNP@PD<sub>x</sub>/Au-Ag-Pt /IO ( $x=60$  and 100).

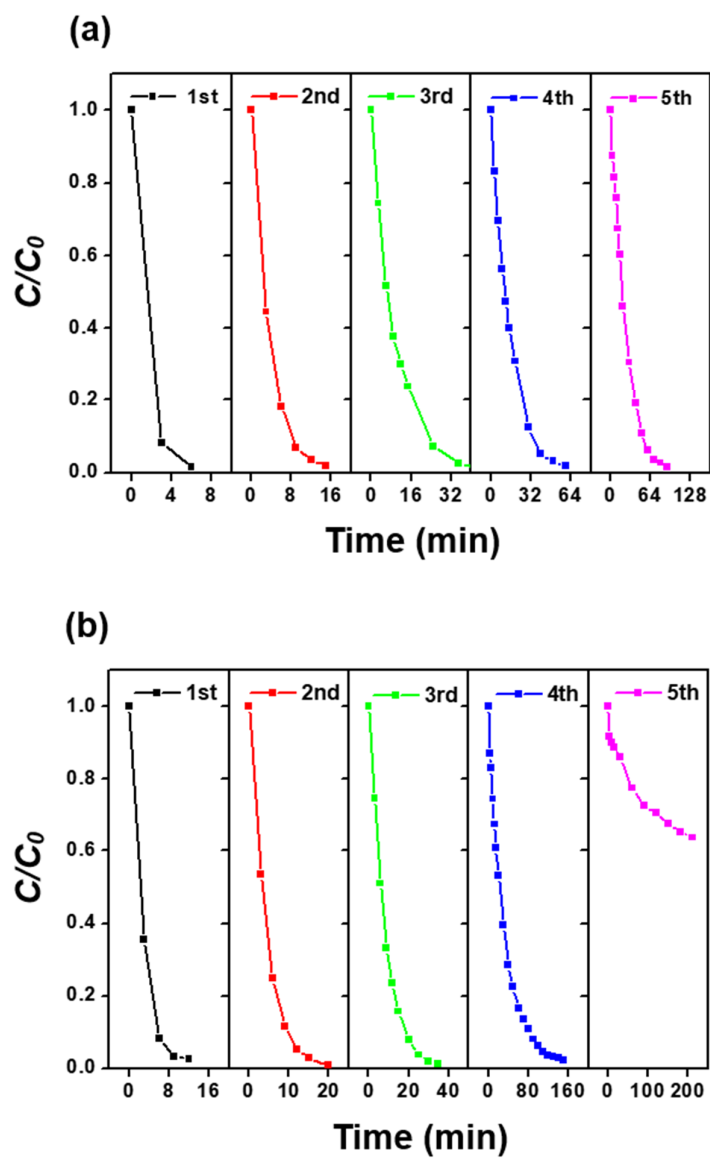

**Figure S10.** Catalytic reduction rates of 4-NPh with 4-APh as a function of the  $n$  reduction cycles by MNP@PD <sub>$x$</sub> /Au-Ag-Pt /IO ( $x=60$  and 100).
